# Supplementary material
Source: publisher figshare collection journal article supplement (https://acs.figshare.com/ndownloader/files/4823617)

# Supporting Information

## Global atmospheric transport and source-receptor relationships for arsenic

*Ka-Ming Wai<sup>1,3</sup>, Shiliang Wu<sup>1,2\*</sup>, Xueling Li<sup>2</sup>, Daniel A. Jaffe<sup>4</sup>, Kevin D. Perry<sup>5</sup>*

<sup>1</sup>Dept. of Geological and Mining Engineering and Sciences, Michigan Technological University, Houghton, Michigan, USA

<sup>2</sup>Dept. of Civil and Environmental Engineering, Michigan Technological University, Houghton, Michigan, USA

<sup>3</sup>now in Institute of Future Cities, Chinese University of Hong Kong, Hong Kong SAR, China.

<sup>4</sup>Physical Sciences Div., School of Science, Technology, Engineering and Mathematics, University of Washington Bothell, Bothell, Washington, USA

<sup>5</sup>Dept. of Atmospheric Sciences, University of Utah, Salt Lake City, Utah, USA

\* Contact information for corresponding author: 1-906-487-2590 (phone); 1-906-487-3371 (fax); [slwu@mtu.edu](mailto:slwu@mtu.edu)

Number of pages: 2

Number of figures: 1

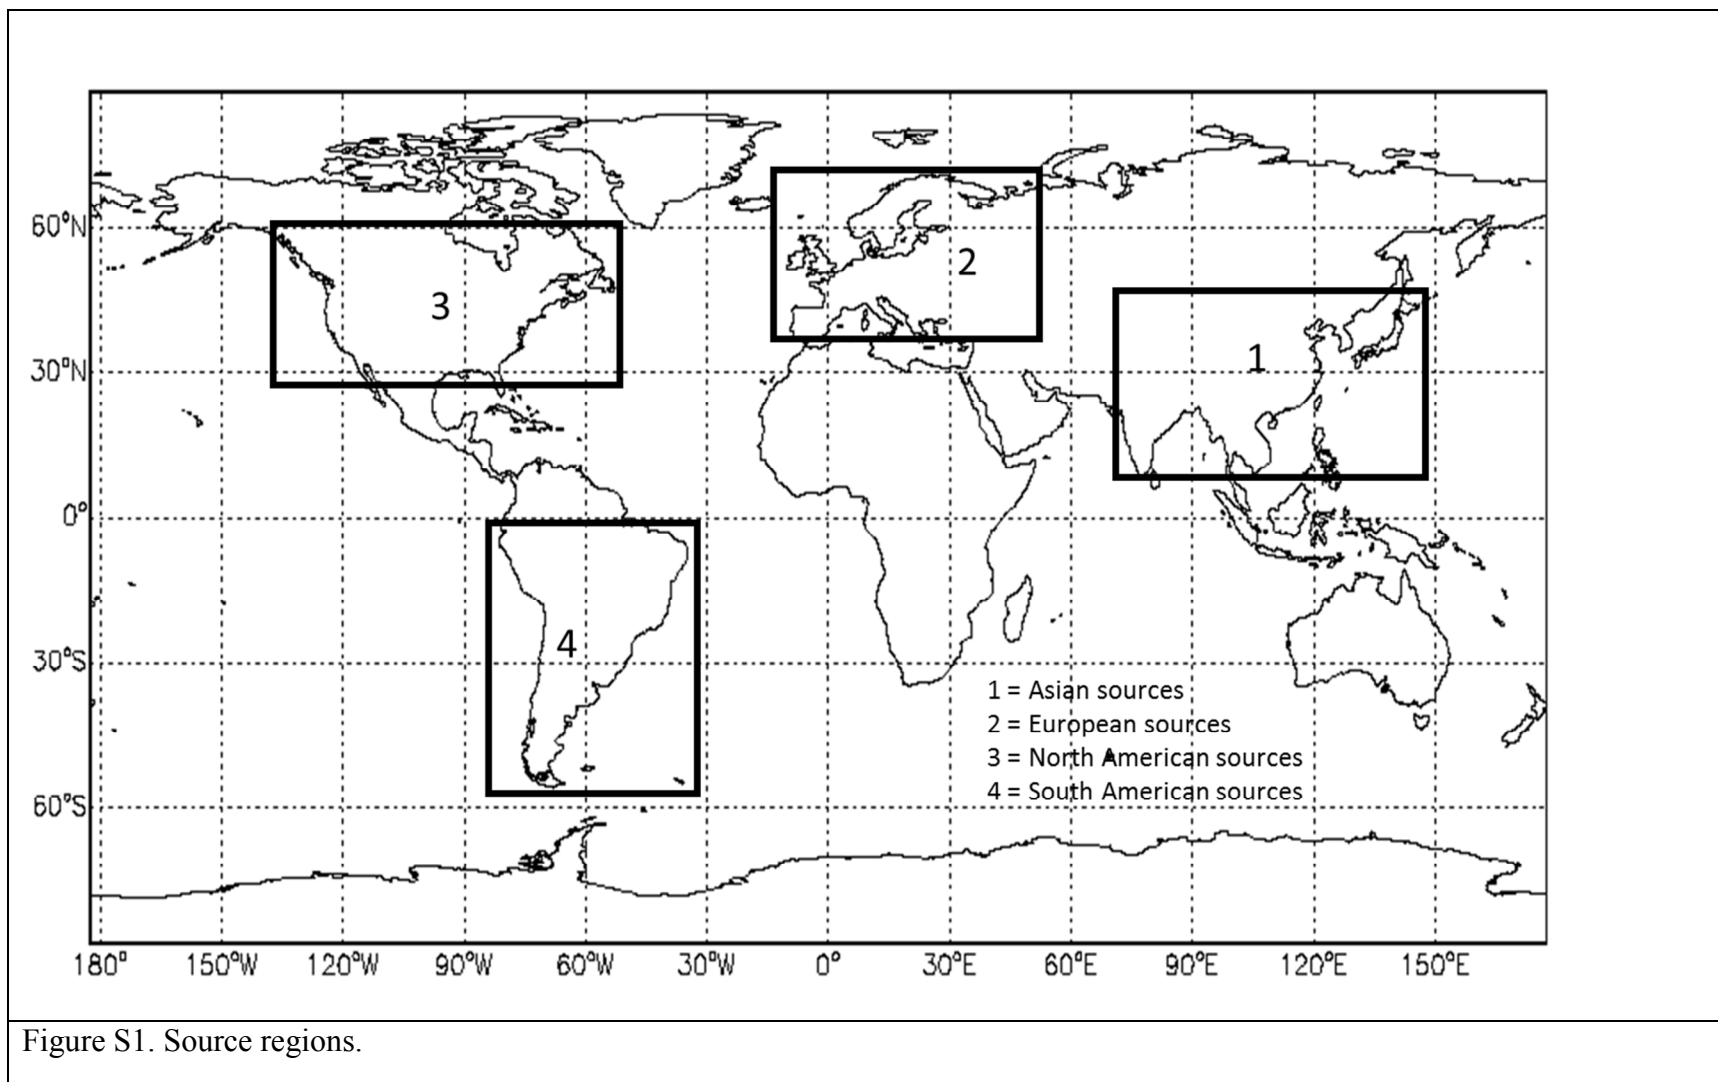

Supplement: Supplementary file 1 [file 4823617]
